1                   **Different genetic architectures of complex traits and**  
2                   **their relevance to polygenic score performance**

3  
4  
5                   Nuno R. G. Carvalho<sup>1,2</sup>, Adrian M. Harris<sup>1,2</sup>, and Joseph Lachance<sup>1\*</sup>  
6

7  
8                   <sup>1</sup>School of Biological Sciences, Georgia Institute of Technology, Atlanta, GA, USA

9                   <sup>2</sup>These authors contributed equally

10                  \*Corresponding author: [joseph.lachance@biology.gatech.edu](mailto:joseph.lachance@biology.gatech.edu)  
11

12  
13                  **Keywords:** complex traits, genetic architecture, Gini coefficients, polygenic scores, population  
14                  genetics  
15

16  
17                  **Running title:** Gini coefficients and polygenic traits  
18

19 **Abstract**

20 Complex traits differ in their genetic architectures, and these differences can affect polygenic  
21 score performance. Examining 177 complex traits from the UK Biobank, we first identified pairs  
22 of traits that have trait-associated SNPs in shared genomic regions. We then compared and  
23 contrasted three aspects of genetic architecture (SNP heritability, trait-specific recombination  
24 rates, and a novel metric of polygenicity) with three aspects of polygenic score performance  
25 (correlations between predicted and actual trait values, portability of genetic predictions, and  
26 divergence across populations). Although highly heritable traits tended to be easier to predict,  
27 heritability was largely uninformative with respect to the portability of genetic predictions. By  
28 contrast, there was a positive relationship between trait-specific recombination rates and the  
29 portability of genetic predictions. Analyzing 100kb bins, we used Gini coefficients to quantify the  
30 extent that SNP heritability is unequally distributed across the genome. Polygenic score  
31 performance was largely independent of Gini – traits with more Mendelian architectures need not  
32 be easier to predict. By contrast, Gini coefficients were negatively correlated with the prevalence  
33 of binary traits. We also found that binary traits were more difficult to predict than quantitative  
34 traits. Interestingly, lifestyle and psychological traits tend to have low heritability, low Gini  
35 coefficients, as well as poor predictability and portability across populations. Because of this, our  
36 results caution against the application of polygenic scores to traits like general happiness, alcohol  
37 frequency, and average income, especially when polygenic scores are applied to individuals who  
38 have an ancestry that differs from the original source population.

## 39 Introduction

40 Recent years have seen an explosive growth in our understanding of the genetics of complex  
41 traits.<sup>1-3</sup> Large datasets, such as the UK Biobank,<sup>4</sup> have facilitated the genetic analysis of complex  
42 traits, and to date over 6000 genome-wide association studies (GWAS) have yielded over  
43 425,000 associations.<sup>5</sup> Despite these discoveries, major knowledge gaps still exist.<sup>6</sup> How can the  
44 field go beyond mere catalogs of statistical associations? One way that GWAS results can be  
45 leveraged is to infer the genetic architecture of complex traits. A second downstream application  
46 of GWAS involves generating polygenic predictions of complex traits and hereditary disease risks.

47 Genetic architecture refers to the distribution of allelic effects, their interactions, and how  
48 segregating genetic variation contributes to differences in traits across individuals.<sup>7</sup> The genetic  
49 architectures of complex traits can be described by lists of trait-associated loci, their frequencies,  
50 and allele-specific effect sizes. The relative importance of genetic and environmental effects  
51 varies by trait, and this can be quantified via estimates of SNP heritability ( $h^2_{SNP}$ ).<sup>8;9</sup> An additional  
52 aspect of genetic architecture involves the extent to which trait-associated SNPs are found in high  
53 or low recombination regions of the genome. These differences are particularly relevant to traits  
54 which are due to a small (i.e., < 100) number of genes, since patterns of linkage disequilibrium  
55 impact the ability of SNPs to tag causal variants and for GWAS findings to replicate across  
56 populations.<sup>10</sup> Traits can also vary in their polygenicity.<sup>11;12</sup> On one extreme are traits which have  
57 a Mendelian genetic architecture, like cystic fibrosis.<sup>13</sup> On the other extreme are highly polygenic  
58 traits like height.<sup>14</sup> Importantly, polygenicity can act as a confounding factor in GWAS analyses.<sup>15</sup>  
59 Recently, an omnigenic model has been proposed - whereby traits have a set of core genes, but  
60 most of the heritability can be explained via indirect effects that are due to gene regulatory  
61 networks.<sup>16</sup> Consistent with the omnigenic model, causal variants for anthropometric and blood  
62 pressure traits have been found throughout the human genome.<sup>17</sup> Despite an awareness of the

63 multiple ways that traits can differ, many aspects of genetic architecture have yet to be quantified  
64 in a comprehensive way.

65 GWAS findings can be used to generate polygenic scores (PGS), called polygenic risk  
66 scores in the context of hereditary diseases.<sup>18</sup> These scores enable traits to be predicted from  
67 genetic information, and they are commonly calculated by summing allele doses across all trait-  
68 associated loci and weighting by effect sizes.<sup>19-21</sup> Although the clinical utility of risk scores has  
69 received a significant amount of attention during the past few years, many PGS yield only modest  
70 case prediction accuracy and show weak correlations between predicted and actual trait values  
71 ( $R^2 < 0.1$ ).<sup>22-24</sup> Even within the same ancestry, PGS accuracy can vary due to socio-economic  
72 status and genotype-environment interactions.<sup>25; 26</sup> These issues are even more pronounced  
73 when genetic predictions are applied to populations that have different ancestries than the original  
74 discovery population.<sup>27-29</sup> For example, predictions of anthropomorphic and blood-related traits  
75 generated from UK Biobank data perform better when applied to British individuals than Japanese  
76 individuals, while predictions generated from Biobank Japan data perform better when applied to  
77 Japanese individuals than British individuals.<sup>23</sup> In a landmark study of over 200 traits from the UK  
78 Biobank, Privé et al. found that the portability of genetic predictions is reduced in proportion to the  
79 genetic distance from the original discovery population.<sup>30</sup> In addition, the predicted values of  
80 complex traits can vary between populations. These shifts in PGS distributions can either be due  
81 to ascertainment bias<sup>31-33</sup> or due to actual differences in traits.<sup>34; 35</sup> Although thousands of PGS  
82 have been generated to date,<sup>24</sup> multiple knowledge gaps exist: Are there particular types of traits  
83 that are hard to predict from genetic data? Which traits have PGS that differ the most across  
84 populations?

85 Here, we leveraged polygenic score weights of 177 traits from the UK Biobank to quantify  
86 how different aspects of genetic architecture affect PGS performance. We first identified pairs of  
87 traits that are influenced by shared genomic regions. We then compared and contrasted three

88 aspects of genetic architecture (SNP heritability, trait-specific recombination rates, and  
89 polygenicity) with three aspects of PGS performance (correlations between predicted and actual  
90 trait values, portability of genetic predictions, and how much PGS distributions diverge across  
91 populations). Finally, we identified suites of traits that have similar genetic architectures and PGS  
92 performance. Notably, binary as well as lifestyle and psychological traits were difficult to predict  
93 with genetic data, while also having PGS that generalize poorly across populations.

94

95

## 96 **Materials and methods**

### 97 **PGS weights for 177 complex traits**

98 Our paper builds upon the PGS weights previously generated by Privé et al.<sup>30</sup> To our knowledge,  
99 this prior study contains the largest number of traits with multi-ancestry PGS performance metrics.  
100 After correcting for sex, age, deprivation index, and 16 principal components (PCs), Privé et al.  
101 used lasso penalized regression<sup>36</sup> to generate PGS from 391,124 British-ancestry individuals of  
102 European descent from the UK Biobank.<sup>30</sup> We restricted our analyses to 177 traits that had  
103 publicly available PGS weights, SNP heritability, and PGS accuracy statistics. We also required  
104 that binary traits have a prevalence above 1% in the UK Biobank. These traits were grouped into  
105 four categories: 55 biological measures (including blood phenotypes), 50 diseases, 24  
106 lifestyle/psychological traits, and 48 physical measures (such as height and weight). A total of 68  
107 of binary and 109 quantitative traits were analyzed here. A full list of traits, as well as summary  
108 statistics of genetic architecture and PGS performance, can be found in Supplemental Table S1  
109 of our paper.

110

## 111 **Genetic variance contributions**

112 We leveraged effect size and allele frequency information to identify the most important trait-  
113 associated SNPs. Specifically, alleles with large effect sizes and minor allele frequencies close to  
114 50% contribute more to the heritable variation of a trait than alleles with small effect sizes and  
115 minor allele frequencies close to zero. As described in earlier work,<sup>37;38</sup> the contribution of a SNP  
116 to the total genetic variance of a trait under Hardy-Weinberg equilibrium and an additive polygenic  
117 model is given by:

$$118 \quad gvc = 2 \times \beta^2 \times p \times (1 - p)$$

119 where *gvc* refers to the genetic variance contribution,  $\beta$  is effect size per allele copy, and *p* is the  
120 frequency of the reference allele in a given population. We recreated eight of the ancestry groups  
121 found in the UK Biobank using the procedure described in Note A of Privé et al.<sup>30</sup>: UK (i.e., British),  
122 Poland, Italy, Iran, India, China, Caribbean, and Nigeria. This data was then used to calculate  
123 ancestry-specific allele frequencies and *gvc* values for each trait-associated SNP.

124

## 125 **Traits with shared genetic architectures**

126 To enable comparisons between the genetic architectures of different traits, we divided the human  
127 genome into non-overlapping 100kb bins and summed the *gvc* for every SNP in each bin. We  
128 opted for a bin-based approach because pleiotropic loci can have different lead SNPs for different  
129 traits, and these lead SNPs need not be in linkage disequilibrium. We forced-ranked 100kb bins  
130 to find the top 100 genomic bins with the largest summed *gvc* for the UK ancestry group, i.e., the  
131 top 100 genomic bins for each trait. We then generated a 177x177 similarity matrix, where each  
132 element is the count of the number of top 100 bins shared by a pair of traits. This similarity matrix  
133 was then used to generate undirected network graphs using the *igraph* package in R. Graphs  
134 were generated for multiple thresholds (5, 10, 15, and 20 overlapping bins). Argo Lite<sup>39</sup> was used

135 to generate an interactive visualization of the graph resulting from a threshold of 10 overlapping  
136 bins.

137

138 **Quantifying three aspects of genetic architecture: heritability, recombination rates, and**  
139 **polygenicity**

140 SNP heritability ( $h^2_{SNP}$ ) estimates for each trait were previously calculated by Privé et al.<sup>30</sup> using  
141 LDpred2-auto.<sup>40</sup>

142 We used the high-resolution recombination map from deCODE<sup>41</sup> to calculate trait-specific  
143 recombination rates. *Liftover* was used to convert this recombination map from GRCh38 to  
144 GRCh37 coordinates, as PGS weights used the GRCh37 build. For each trait, we focused on  
145 SNPs located in the 100 bins with the largest summed *gvc* for the UK ancestry group. We  
146 then calculated the local arithmetic mean recombination rate for 100kb genomic windows  
147 centered around each trait-associated SNP (50kb to either side). We then weighted each  
148 SNP by *gvc* to calculate the arithmetic mean recombination rate for each trait, which we  
149 denote as  $R$  (units: cM per Mb).

150 We quantified whether traits have Mendelian or polygenic architectures using a novel  
151 application of Gini coefficients. These coefficients have typically been used in economics to  
152 calculate wealth or income inequality,<sup>42</sup> and they range between zero (maximum equality) and  
153 one (maximum inequality). Here, we used Gini coefficients to quantify the extent that summed  
154 *gvc* is evenly distributed among the top 100 genomic bins for each trait. Focusing on the top 100  
155 genomic bins maximizes the dynamic range of Gini coefficients for the 177 traits analyzed in this  
156 study (see Supplemental Information). For traits that had fewer than 100 bins with significant  
157 SNPs, the remaining bins were padded with values of zero so that Gini coefficient calculations

158 always consisted of 100 elements. Gini coefficients were calculated using the following equation,  
159 which requires that bins are sorted by  $gvc$  in ascending order:

$$160 \quad G_{100,UK} = \frac{\sum_{i=1}^n (2i - n - 1) \times gvc_{i,UK}}{n \times \sum_{i=1}^n gvc_{i,UK}}$$

161 where  $n = 100$  and  $gvc_{i,UK}$  is the summed genetic variance contribution of the  $i^{\text{th}}$  bin using allele  
162 frequencies from the UK ancestry group. Using <https://github.com/oliviaguest/gini> as a guide, we  
163 implemented a computationally efficient R script that uses the above equation to compute Gini  
164 coefficients for each trait. An examination of the robustness of Gini coefficients to the source of  
165 PGS weights, different numbers of 100kb bins, and choice of ancestry group can be found in the  
166 Supplemental Information.

167

### 168 **Quantifying three aspects PGS performance: accuracy, portability, and divergence**

169 Here, PGS accuracy refers to how well genetic predictions work when individuals are ancestry-  
170 matched to the original training set (i.e., British individuals from the UK). For each trait, partial  
171 correlations between predicted and actual trait values for Privé et al.'s UK ancestry group ( $\rho_{UK}$ )  
172 were used to quantify PGS accuracy.<sup>30</sup> These partial correlations were generated using the  
173 residuals of actual trait values vs. PGS after correcting for the following covariates: age, sex, birth  
174 date, deprivation index, and population structure (16 PCs).<sup>30</sup> This statistic was calculated using  
175 genome-wide PGS weights.

176 Partial correlations between predicted and actual trait values were obtained for the seven  
177 other ancestries,<sup>30</sup> which were then used to derive a portability index that quantifies how PGS  
178 accuracy diminishes with increased genetic distance from the original training population. For  
179 each trait and ancestry group, PGS accuracy relative to the UK ancestry group was found by  
180 dividing the partial correlation between predicted and actual trait values for each ancestry group  
181 by the partial correlation for the UK ancestry group. Similarly, as per Privé et al.,<sup>30</sup> the geometric



182 mean position of each ancestry group in 16-dimensional PC space was used to obtain the  
183 Euclidean genetic distance between each ancestry group and the UK ancestry. For each trait,  
184 relative PGS accuracy was plotted against genetic distance to the UK ancestry group, and linear  
185 regression was used to quantify PGS portability. We define the slope of the regression line for  
186 each trait ( $m$ ) as the portability index of that trait. Regression lines were required to pass through  
187 the UK datapoint (0,1). Noisy PGS accuracy statistics can cause some traits to have slopes above  
188 0. When this occurred, we manually set  $m = 0$ , i.e., perfect portability. Because estimates of  $m$   
189 are noisy for individual traits, we restricted our analyses of trait portability to sets of traits.

190 We also developed a summary statistic that quantifies how much PGS distributions have  
191 diverged across populations. For computational efficiency, SNPs in the top 100 genomic bins with  
192 the largest summed  $gvc$  were used to calculate PGS distributions for each of the eight UK Biobank  
193 ancestries described above. Plink 1.9 was used to convert genetic data into an R-readable matrix  
194 of the number of effect alleles. Numbers of individuals for each ancestry group in the UK Biobank  
195 were down-sampled to 1,234 - the smallest number of samples in any one ancestry group. PGS  
196 scores were calculated by summing across all  $L$  trait-associated SNPs in the top 100 genomic  
197 bins for each trait, and weighting by allele dose ( $d_{j,k}$ ) and effect size ( $B_k$ ):

$$198 \quad PGS_j = \sum_{k=1}^L d_{j,k} \beta_k$$

199 where  $j$  indexes each individual and  $k$  indexes each trait-associated SNP. We then generated  
200 PGS distributions for each ancestry group and all 177 traits. Because PGS are calculated by  
201 summing the effects of multiple independent SNPs, these distributions tend to normally  
202 distributed. We then log-transformed the F-statistic from a one-way ANOVA to derive a metric ( $D$ )  
203 which quantifies population-level shifts in PGS distributions for each trait:

$$204 \quad D = \log_{10} F$$

205 where  $F$  refers to the ratio of between-ancestry group variability to within-ancestry group  
206 variability. We note that meaningful comparisons of  $D$  statistics for different traits require that  
207 same number of individuals from each ancestry group were analyzed for each trait, as was the  
208 case in our study design.

209

## 210 **Comparisons between different aspects of genetic architecture and PGS performance**

211 Our manuscript focuses on three summary statistics of genetic architecture ( $h^2_{SNP}$ ,  $R$ ,  $G_{100,UK}$ ) and  
212 three summary statistics of PGS performance ( $\rho_{UK}$ ,  $m$ , and  $D$ ) for each trait. To compare different  
213 aspects of genetic architecture and PGS performance, we obtained a linear best fit for each pair  
214 of summary statistics, generating correlation coefficients and p-values. Because 15 pairwise  
215 comparisons were made, a False Discovery Rate (FDR)<sup>43</sup> adjustment was applied to each p-value  
216 using the `p.adjust()` command in R. Note that the Benjamini-Hochberg FDR procedure can cause  
217 p-values to clump.

218 We also assessed how distributions of six summary statistics ( $h^2_{SNP}$ ,  $R$ ,  $G_{100,UK}$ ,  $\rho_{UK}$ ,  $m$ ,  
219 and  $D$ ) vary for different types of traits. First, we compared the summary statistic distributions of  
220 binary traits with the distributions of quantitative traits. We then compared the summary statistic  
221 distributions of quantitative lifestyle/psychological traits with the distributions of other quantitative  
222 traits. Wilcoxon rank sum tests<sup>44</sup> were used for these summary statistic comparisons, and FDR-  
223 adjusted p-values were used to correct for multiple comparisons. For binary traits, we also  
224 compared summary statistics of genetic architecture and PGS performance to the  $\log_{10}$   
225 prevalence of each trait in the UK Biobank, generating Pearson's correlation coefficients and  
226 FDR-adjusted p-values for each comparison.

227 Principal component analysis (PCA) was used to identify traits with similar summary  
228 statistics. Specifically, we applied the `prcomp()` function in R on a 177x6 array containing genetic

229 architecture and PGS performance summary statistics for all traits. This approach was repeated  
230 for all quantitative traits using a 109x6 array of summary statistics. PCA plots used a modified  
231 version of the *ggbiplot* package in R, with 68% probability ellipses (+/- one standard deviation)  
232 shown for different types of traits.

233

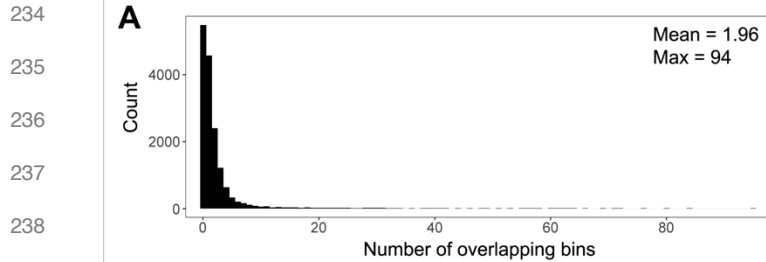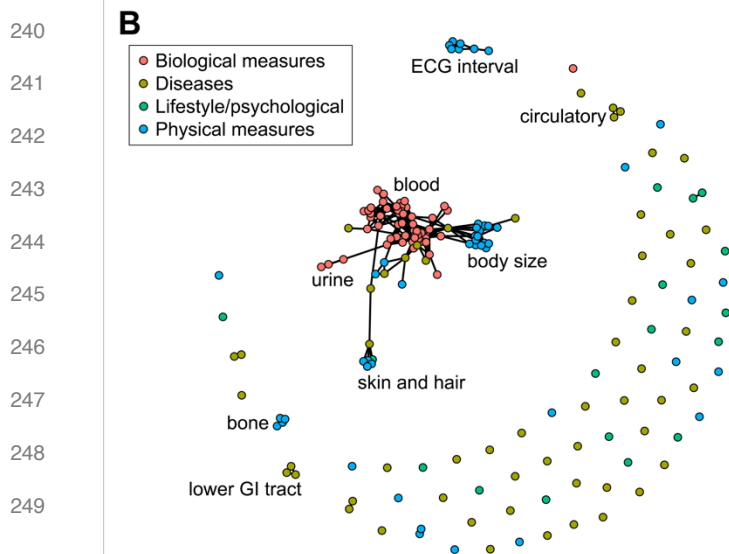

**Figure 1. Constellations of traits with shared genetic architectures.** Here, we focused on the top 100 genomic bins for each trait. (A) Histogram of the number of 100kb bins shared between all possible pairs of traits. (B) Networks of traits with shared genetic architectures. Each node is a different trait, and coloring indicates trait group. Edges link pairs of traits that have at least 10 overlapping bins out of the top 100 bins for each trait, as inferred by summed *gvc*. Distances between separate networks are arbitrary.

251

252

## 253 Results

### 254 Overlap between the genetic architectures of different traits

255 Which traits have heritable variation in the same regions of the genome? To answer this question,  
256 we divided the genome into 100kb bins and examined whether the top 100 bins for each trait

257 overlapped with other traits. In general, most pairs of traits share a small number of 100kb bins  
258 (1.96 mean shared bins in Figure 1A). Overlap tended to be greater for pairs of traits in the same  
259 trait group (Figure S1). For example, traits associated with biological measures shared a mean of  
260 7.03 bins. The traits with the most overlap between one another were two body weight traits (log  
261 water mass and log fat free mass, sharing 94 of their top 100 bins). The 100kb bin associated  
262 with the most traits was chr2:27,700,001-27,800,000 (hg19) with overlap in 48 of the 177 traits.  
263 This genomic region includes *GCKR* (Glucokinase Regulator), a gene integral to glucose  
264 metabolism and abundantly expressed in the liver.<sup>45</sup>

265 Overlapping 100kb bins reveal networks of connected traits. Here, we focused on pairs of  
266 traits that overlap in at least 10 of their top 100 genomic bins (Figure 1B). Networks generated  
267 from other overlap thresholds can be seen in Figure S2. An interactive data visualization that  
268 includes the names of all traits can be found at: <https://tinyurl.com/y2pmpx8a>. In Figure 1B, the  
269 network with the greatest number of nodes contains 86 traits. Subnetworks within this large  
270 structure correspond to urine, blood pressure, erythrocyte, platelet, leukocyte, inflammation, skin  
271 and hair, body size, and blood pressure traits. Interestingly, the nodes at which these subnetworks  
272 connect to the central mass are biologically intuitive. For instance, hypertension, diastolic blood  
273 pressure and systolic blood pressure have deep interconnectedness with edges extending to  
274 coronary atherosclerosis, which in turn, connects to blood metabolite traits like cholesterol,  
275 apolipoprotein B, and lipoprotein A. Figure 1B also reveals smaller networks of interconnected  
276 traits. For example, diseases of the lower GI tract cluster together, as do traits associated with  
277 ECG intervals. We note that our bin-based approach was able to reconstitute similar clusters of  
278 correlated traits as found via cross-trait LD-Score regression<sup>46</sup> and linear mixed models.<sup>47</sup>  
279 However, while trait networks reveal the shared genetic architecture between traits, we note that  
280 they do not capture other aspects of the genetic architecture of complex traits, such as heritability,  
281 polygenicity, and local recombination rates.

282

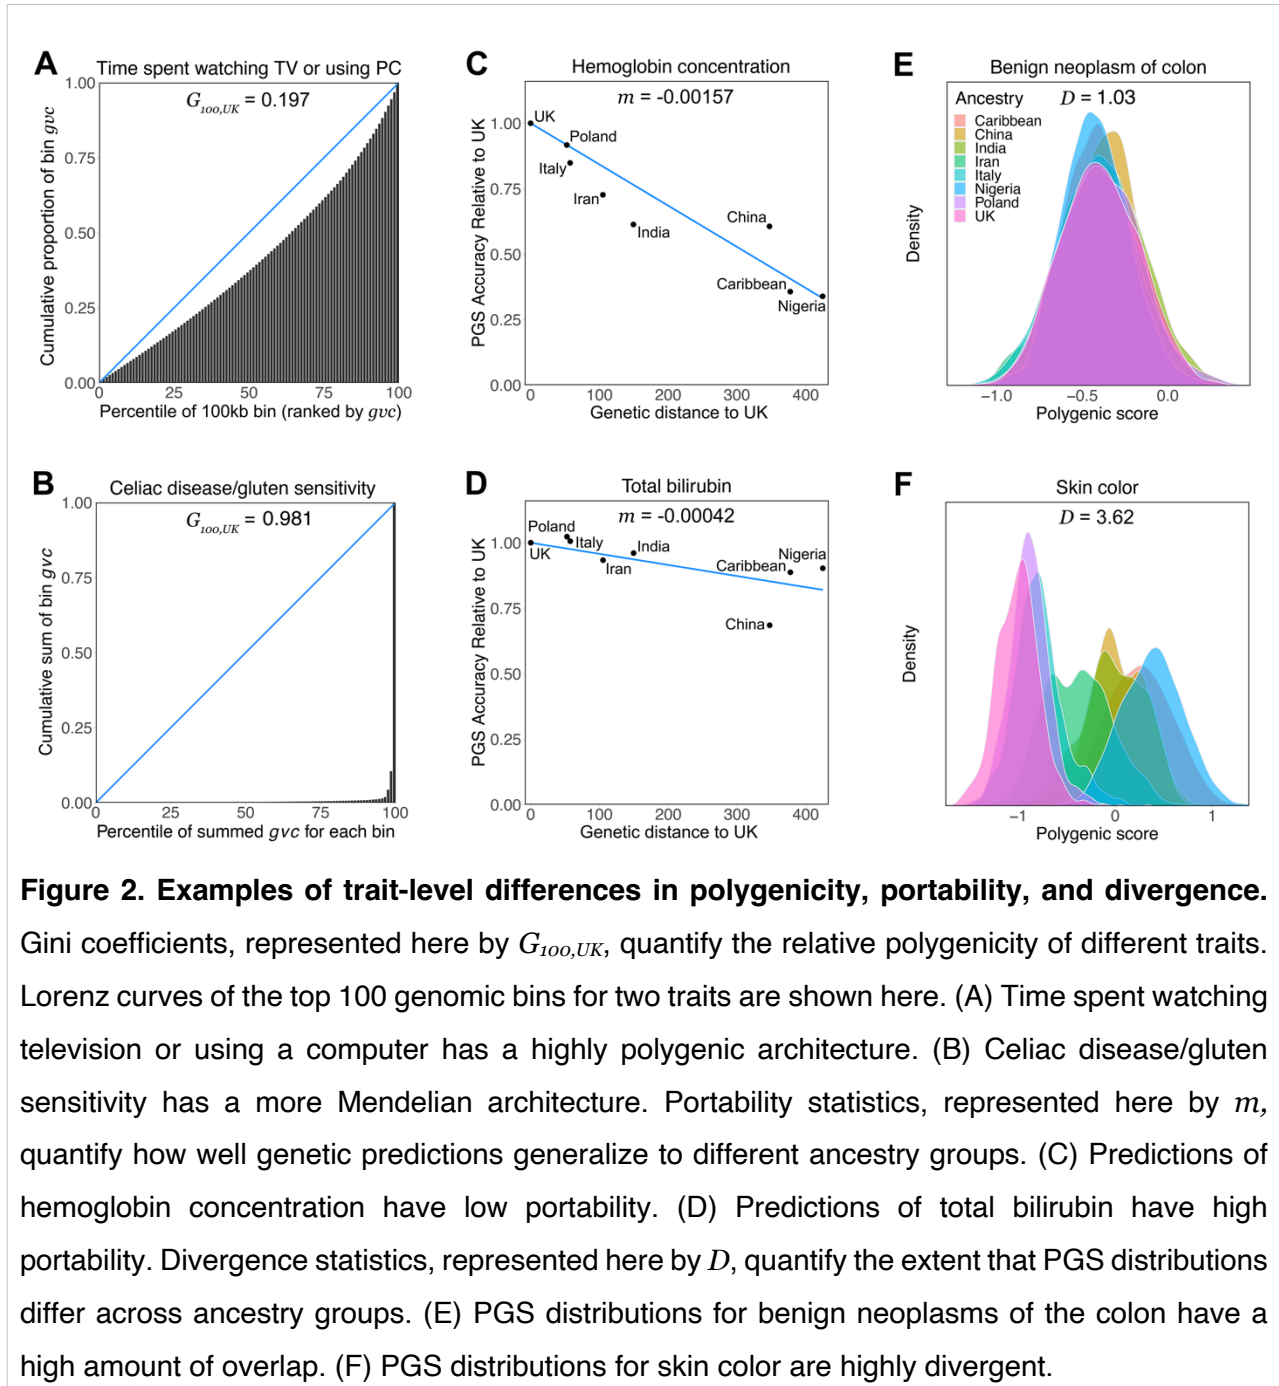

283

284 **Figure 2. Examples of trait-level differences in polygenicity, portability, and divergence.**

285 Gini coefficients, represented here by  $G_{100,UK}$ , quantify the relative polygenicity of different traits.  
 286 Lorenz curves of the top 100 genomic bins for two traits are shown here. (A) Time spent watching  
 287 television or using a computer has a highly polygenic architecture. (B) Celiac disease/gluten  
 288 sensitivity has a more Mendelian architecture. Portability statistics, represented here by  $m$ ,  
 289 quantify how well genetic predictions generalize to different ancestry groups. (C) Predictions of  
 290 hemoglobin concentration have low portability. (D) Predictions of total bilirubin have high  
 291 portability. Divergence statistics, represented here by  $D$ , quantify the extent that PGS distributions  
 292 differ across ancestry groups. (E) PGS distributions for benign neoplasms of the colon have a  
 293 high amount of overlap. (F) PGS distributions for skin color are highly divergent.

294

295 **Novel metrics of genetic architecture and polygenic score performance**

296 We used a novel application of Gini coefficients to quantify the polygenicity of complex traits. A  
 297 low Gini coefficient indicates that the genetic variance of a trait tends to be equally distributed

298 among different SNPs, with fully polygenic traits having Gini coefficients of zero. By contrast, a  
299 high Gini coefficient indicates that a large portion of a trait's genetic variance is explained by a  
300 small set of SNPs, with fully Mendelian traits having Gini coefficients of one. Across the 177 traits  
301 analyzed here, Gini coefficients ( $G_{100,UK}$ ) ranged from 0.149 to 0.988. Traits with the lowest and  
302 highest Gini coefficients are shown in Table 1. Lorenz curves can be used to visualize how Gini  
303 coefficients summarize differences in *gvc* distributions for complex traits. An example of a more  
304 polygenic trait is "time spent watching television or using the computer" ( $G_{100,UK} = 0.197$ , Figure  
305 2A). An example of a more Mendelian trait is celiac disease/gluten sensitivity ( $G_{100,UK} = 0.981$ ,  
306 Figure 2B). We note that traits with large Gini-coefficients also tend to have a larger proportion of  
307 their summed *gvc* in the top 100 bins (Figure S3). In addition, the rank orders of Gini coefficients  
308 were largely robust to: the method used to obtain PGS weights (Figure S4), whether Gini  
309 coefficients were generated from the top SNPs or the top genomic bins (Figure S5), the number  
310 of genomic bins that were examined (Figure S6), and choice of ancestry group (Figure S7); see  
311 Supplemental Information for additional details.

312 Another aspect of PGS performance is the portability of results across different  
313 populations. For each trait, we plotted the relative PGS accuracy for different ancestry groups,  
314 applied a linear model, and used the slope ( $m$ ) to quantify the portability of genetic predictions. If  
315  $m = 0$ , genetic predictions work equally well for each ancestry group. By contrast, strongly  
316 negative slopes ( $m < 0$ ) indicate increasingly poor predictive power relative to the UK ancestry  
317 group. Here, we use two examples to illustrate how genetic predictions of complex traits can differ  
318 in their portability. Hemoglobin concentration has a low portability statistic ( $m = -0.00157$ , Figure  
319 2C). By contrast, total bilirubin concentration has a high portability statistic ( $m = -0.00042$ , Figure  
320 2D). For the 177 traits analyzed in this study,  $m$  ranged from -0.00489 to 0 (see Table S1 for a  
321 full list).

322 Our paper also includes a novel metric of PGS divergence across populations ( $D$ ). This  
323 metric was calculated by examining PGS distributions for eight different ancestries and converting  
324 F statistics from a one-way ANOVA to a  $\log_{10}$  scale.  $D$  statistics near zero arise when ancestry-  
325 specific PGS distributions have similar means; higher values of  $D$  statistics arise when ancestry-  
326 specific PGS distributions have different means. Because of this,  $D$  statistics can be used to  
327 quantify ancestry-specific shifts in PGS distributions. Lists of the most and least divergent traits  
328 are shown in Table 2 and Table S1. An example of a trait with minimal PGS divergence is benign  
329 neoplasm of the colon ( $D = 1.03$ , Figure 2E). An example of a trait with substantial divergence  
330 between ancestries is skin color ( $D = 3.62$ , Figure 2F). Values of  $D$  statistics range between 1.03  
331 to 3.62 for the 177 traits analyzed here.

332

333 **Table 1. Traits with the lowest and highest**  
334 **Gini coefficients**

| Rank | Trait                                               | $G_{100,UK}$ |
|------|-----------------------------------------------------|--------------|
| 1    | Overall health rating                               | 0.149        |
| 2    | Neuroticism score                                   | 0.168        |
| 3    | Ever smoked                                         | 0.179        |
| 4    | Plays computer games                                | 0.187        |
| 5    | Time spent watching television or using computer    | 0.197        |
| ...  | ...                                                 | ...          |
| 173  | Superficial cellulitis and abscess                  | 0.951        |
| 174  | Hair color (natural before greying)                 | 0.959        |
| 175  | Other biliary tract disease                         | 0.977        |
| 176  | Diagnosed with celiac disease or gluten sensitivity | 0.981        |
| 177  | Allergy/adverse effect of penicillin                | 0.988        |

335 Higher values of  $G_{100,UK}$  are indicative of traits  
336 with more mendelian architectures.

337 **Table 2. Traits with the lowest and highest**  
338 **divergence statistics**

| Rank | Trait                                 | $D$  |
|------|---------------------------------------|------|
| 1    | Benign neoplasm of the colon          | 1.03 |
| 2    | Urinary calculus                      | 1.21 |
| 3    | Sodium in urine                       | 1.22 |
| 4    | Myopia diagnosis                      | 1.24 |
| 5    | High light scatter reticulocyte count | 1.26 |
| ...  | ...                                   | ...  |
| 173  | Albumin                               | 3.12 |
| 174  | Use of sun/UV protection              | 3.28 |
| 175  | Hair color (natural, before greying)  | 3.51 |
| 176  | Ease of skin tanning                  | 3.57 |
| 177  | Skin color                            | 3.62 |

339 Higher values of  $D$  are indicative of traits that  
340 have PGS distributions that differ more  
341 across between groups.

342

343

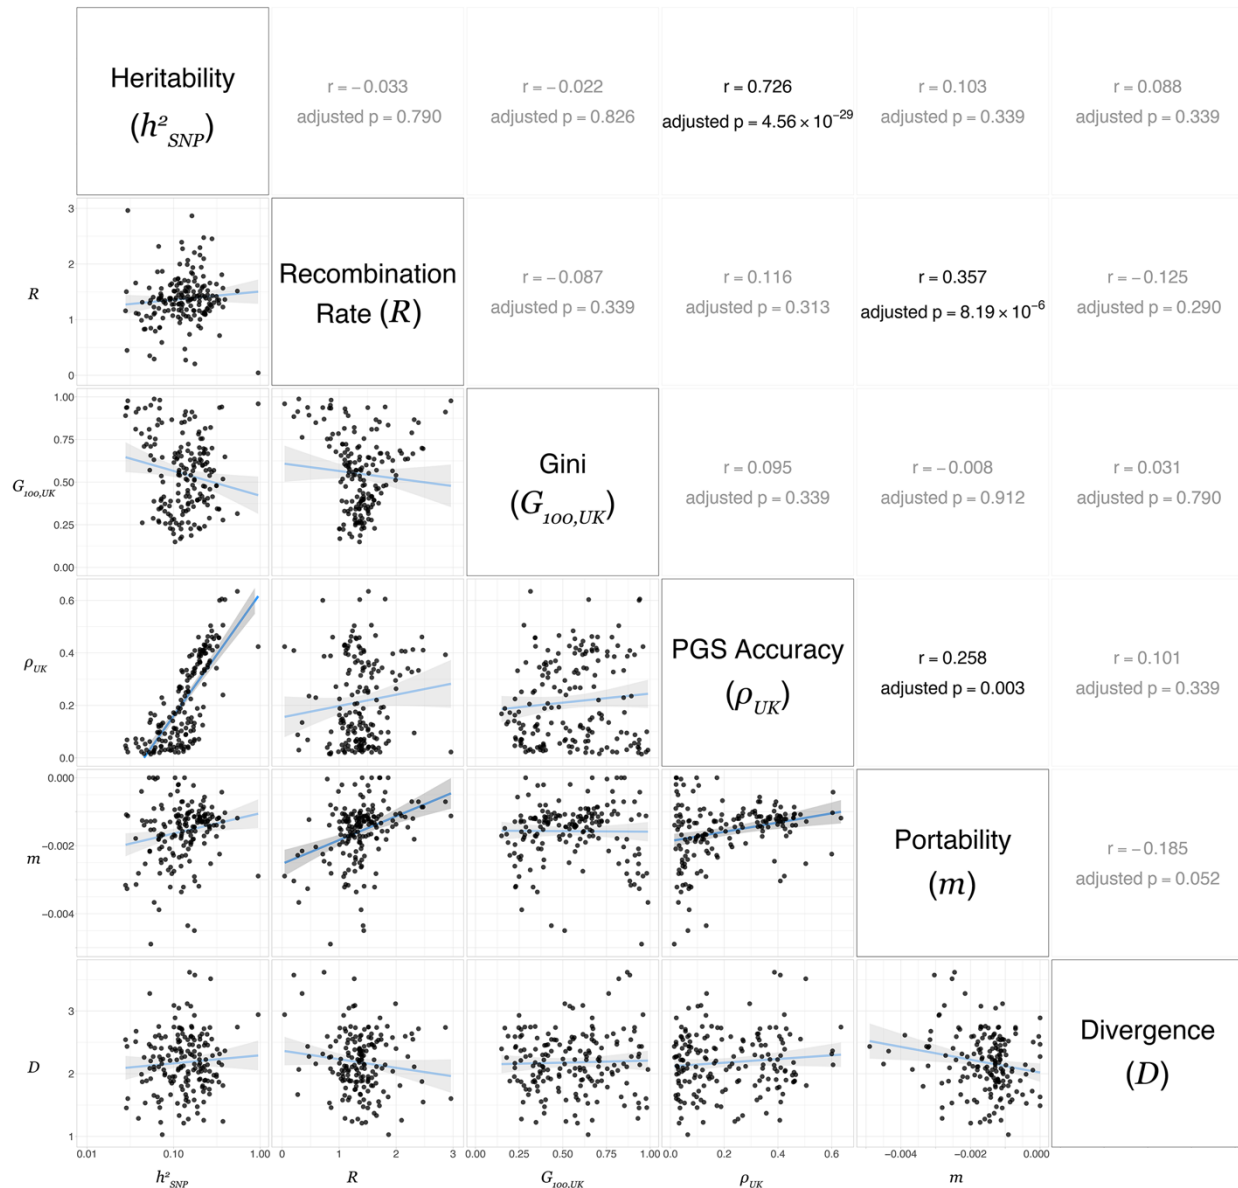

344

345

346 **Figure 3. Comparisons between different aspects of genetic architecture and PGS**

347 **performance.** Each scatterplot corresponds to a different pair of summary statistics, and each

348 datapoint corresponds to a different complex trait. All comparisons and p-values use FDR-

349 adjusted Wilcoxon rank sum tests. Statistically significant results are shown in bold. Summary

350 statistics for all 177 traits can be found in Supplemental Table S1.

351



## 352 **Comparisons between different aspects of genetic architecture**

353 SNP heritabilities, Gini coefficients, and trait-specific recombination rates capture different  
354 aspects of genetic architecture (upper left part of Figure 3). We found that highly heritable traits  
355 were not any more or less likely to have SNPs in high recombination regions of the genome ( $r =$   
356  $-0.033$ ,  $p = 0.790$ ). Similarly,  $h^2_{SNP}$  was largely independent of polygenicity, as quantified by  $G_{100,UK}$   
357 ( $r = -0.022$ ,  $p = 0.826$ ). Although there was no linear relationship between trait-specific  
358 recombination rates and Gini coefficients ( $r = -0.087$ ,  $p = 0.339$ ), we note that a plot of  $R$  vs  $G_{100,UK}$   
359 yields a distinctive triangular pattern (Figure 3). This pattern arises because highly polygenic traits  
360 tend to have recombination rates that resemble the genome-wide mean, since those traits'  
361 recombination rates are averaged across the entire genome, while traits with more Mendelian  
362 architectures can potentially be enriched for SNPs in either high or low recombination regions of  
363 the genome. For example, genetic variants associated with Apolipoprotein B tend to be found in  
364 high recombination regions of the genome ( $R = 2.87$  cM/Mb), and genetic variants associated  
365 with allergy/adverse effect of penicillin tend to be found in low recombination regions ( $R = 0.293$   
366 cM/Mb). The low correlations seen here underscore the fact that no single metric can summarize  
367 the genetic architecture, while each metric yields important insights in understanding the genetics  
368 of complex traits.

369

## 370 **Comparisons between different aspects of polygenic score performance**

371 Complex traits vary in multiple aspects of PGS performance: accuracy, portability, and divergence  
372 (lower right part of Figure 3). We found that PGS accuracy and portability were positively  
373 correlated ( $r = 0.258$ ,  $p = 0.003$ ). An example of a trait with high PGS accuracy and high portability  
374 is mean platelet volume ( $\rho_{UK} = 0.603$ ,  $m = -0.0103$ ). An example of a trait with low PGS accuracy  
375 and low portability is general happiness ( $\rho_{UK} = 0.0697$ ,  $m = -0.00388$ ). Portability statistics are

376 noisier for traits that are hard to predict in British individuals from the UK. Because of this, values  
377 of  $m$  are highly variable when  $\rho_{UK}$  is close to zero. We note that divergence and portability  
378 statistics are negatively correlated, although this trend does not quite reach statistical significance  
379 ( $r = -0.185$ ,  $p = 0.052$ ). This pattern can arise from a combination of ascertainment bias and allele  
380 frequency differences between populations.<sup>31</sup> There were no broad trends when trait divergence  
381 was compared to PGS accuracy ( $r = 0.101$ ,  $p = 0.339$ ). Collectively, these results indicate that  
382 PGS performance is largely trait-specific.

383

### 384 **Relevance of genetic architecture to polygenic score performance**

385 How do SNP heritabilities, trait-specific recombination rates, and polygenicity relate to PGS  
386 accuracy, portability and divergence? Although not all combinations of genetic architecture and  
387 PGS performance yielded clear associations, a few notable patterns can be seen in Figure 3. As  
388 expected, traits with a high SNP heritability tended to have a high PGS accuracy ( $r = 0.726$ ,  $p =$   
389  $4.56 \times 10^{-29}$ ). We note that heritability refers to the proportion of phenotypic variance that is due  
390 to genetic effects in a single population (i.e., it is a population-specific concept). This suggests  
391 that  $h^2_{SNP}$  estimates may not be that informative about how well predictions generalize across  
392 populations. Indeed, SNP heritabilities were largely uninformative about the portability of  
393 polygenic predictions ( $r = 0.103$ ,  $p = 0.339$ ). SNP heritabilities were also non-informative about  
394 the divergence of predicted trait values ( $r = 0.088$ ,  $p = 0.339$ ). By contrast, traits with SNPs in high  
395 recombination regions of the genome tended to have genetic predictions that were more portable  
396 across populations, i.e., there was a positive correlation between trait-specific recombination rates  
397 and portability ( $r = 0.357$ ,  $p = 8.19 \times 10^{-6}$ ). However, trait-specific recombination rates were largely  
398 uninformative with respect to PGS accuracy ( $r = 0.116$ ,  $p = 0.313$ ) and divergence ( $r = -0.125$ ,  $p$   
399  $= 0.290$ ). Gini coefficients were largely uncorrelated with PGS accuracy, portability, and trait  
400 divergence (Figure 3). This means that traits with more Mendelian, i.e., simpler, genetic

401 architectures need not be easier to predict. An additional complication is that rare binary traits  
 402 tend to have large  $G_{100,UK}$  statistics, while lifestyle and psychological traits tend to have small  
 403  $G_{100,UK}$  statistics (see below). Rare binary traits are difficult to predict, as are lifestyle/psychological  
 404 traits, which helps explain why Gini coefficients and PGS performance appear to be independent  
 405 in our study.  
 406

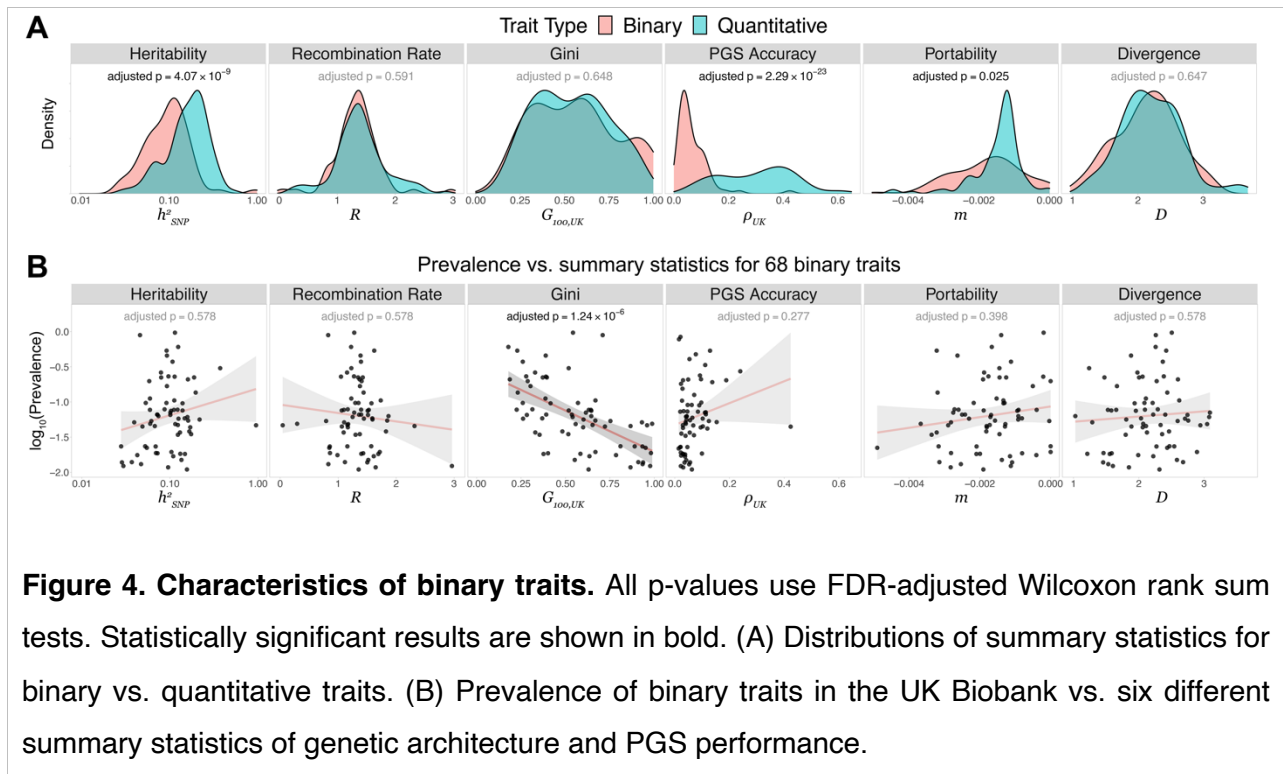

413

#### 414 **Summary statistics differ for binary and quantitative traits**

415 One natural way to classify traits is whether they are binary or quantitative (the latter including  
 416 both ordinal and continuous traits). We note that all the disease traits analyzed in our study are  
 417 binary. In addition, the statistical power to detect genetic associations differs for binary and  
 418 quantitative traits.<sup>48</sup> Both of these details can affect estimates of genetic architecture and PGS  
 419 performance. Indeed, we observed differences in the summary statistics of binary and quantitative

420 traits (Figure 4A). On average, binary traits tended to have a lower SNP heritability than  
421 quantitative traits ( $p = 4.07 \times 10^{-9}$ ). However, binary traits were not any more likely than  
422 quantitative traits to have Mendelian architectures ( $p = 0.648$  for  $G_{100,UK}$  comparisons). This  
423 pattern can occur if binary traits arise from polygenic effects that exceed a threshold.<sup>49</sup> Focusing  
424 on different aspects of PGS performance, we found that PGS accuracy was much lower for binary  
425 traits than quantitative traits ( $p = 2.23 \times 10^{-23}$ ). For example, partial correlations between predicted  
426 and actual trait values were lower for hypertension ( $\rho_{UK} = 0.188$ ) than for systolic blood pressure  
427 ( $\rho_{UK} = 0.255$ ). Binary traits also had a wider range of portability statistics than quantitative traits  
428 (Figure 4A). Finally, we note that divergence statistics were similar for binary and quantitative  
429 traits. A PCA plot generated from six summary statistics of genetic architecture and PGS  
430 performance also demonstrates that binary traits have different profiles than quantitative traits  
431 (Figure S8).

432 To further explore the genetic architectures and PGS performance of binary traits, we  
433 examined whether rare or common traits have different properties than quantitative traits. We  
434 plotted each summary statistic against the  $\log_{10}$ -transformed prevalence of binary traits within the  
435 UK Biobank dataset (Figure 4B). For five of these summary statistics there was no linear trend.  
436 By contrast, we found that Gini coefficients were negative correlated with prevalence ( $r = -0.581$ ,  
437  $p = 1.24 \times 10^{-6}$ ), indicating that rarer complex traits appear to have more Mendelian architectures.  
438 This pattern aligns with previously published findings that rare diseases tend to have a Mendelian  
439 architecture.<sup>50; 51</sup> The low  $G_{100,UK}$  statistics of rare traits may be due to limited statistical power to  
440 identify trait-associated alleles.<sup>52</sup> However, we note that  $\rho_{UK}$  statistics are largely independent of  
441 the prevalence of binary traits (Figure 4B), i.e., PGS accuracy is not appreciably different for rare  
442 or common traits. This suggests that the relationship between Gini coefficients and prevalence is  
443 due to the underlying biology, rather than a statistical artifact.

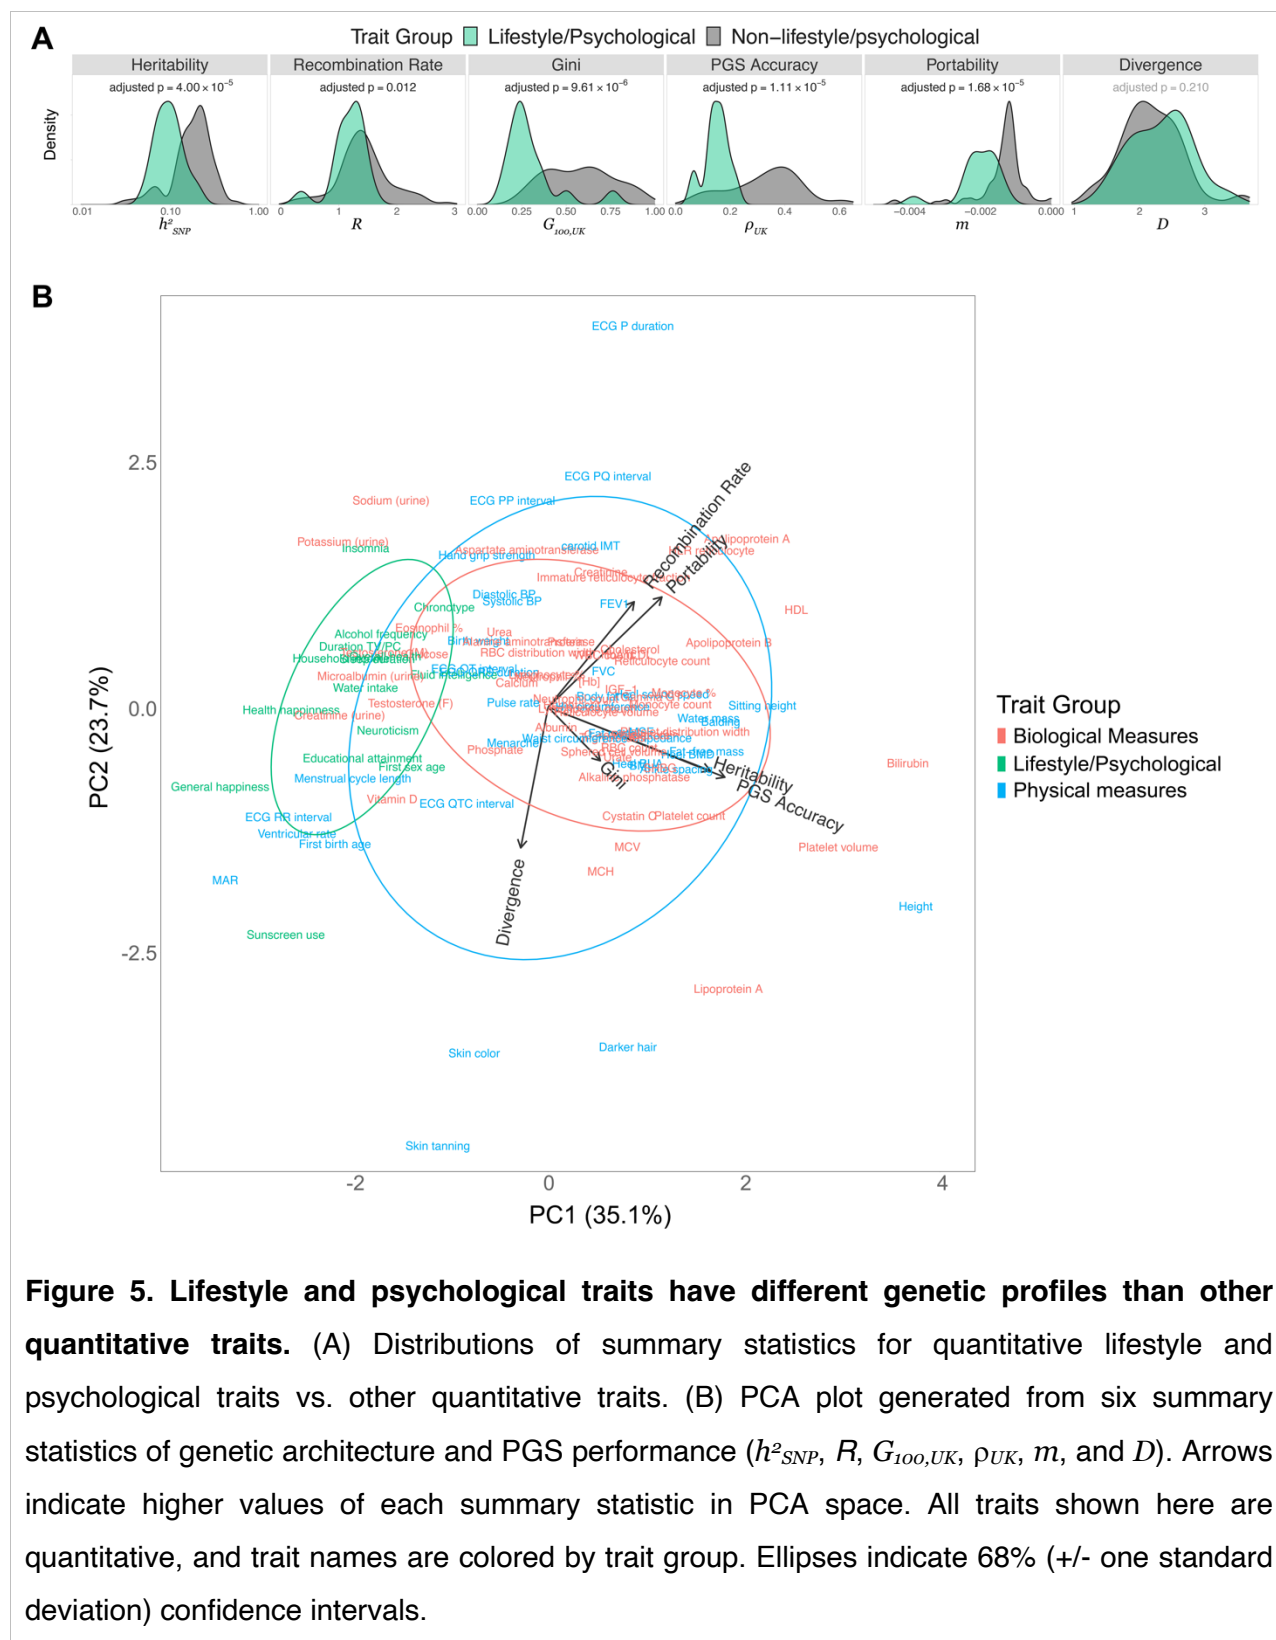

## 452 **Limitations of polygenic scores for lifestyle and psychological traits**

453 We also examined whether summary statistics of lifestyle and psychological traits differed from  
454 other quantitative traits. Examples of these complex behavioral traits include alcohol frequency,  
455 chronotype, educational attainment, happiness, neuroticism, and water intake. Overall, there are  
456 noticeable differences in the genetic architecture and PGS performance of different types of  
457 quantitative traits (Figure 5A). On average, lifestyle and psychological traits have lower SNP  
458 heritabilities than other quantitative traits ( $p = 4.00 \times 10^{-5}$ ). This pattern is consistent with the  
459 importance of environmental effects for behavioral traits. Low heritability also has a knock-on  
460 effect of reducing the effectiveness of polygenic predictions. Indeed, we found that PGS accuracy  
461 was much lower for lifestyle and psychological traits ( $p = 1.11 \times 10^{-5}$ ). Furthermore, we note that  
462 there was a clear lack of lifestyle and psychological traits with high  $\rho_{UK}$  statistics (Figure 5A).  
463 Genetic predictions of lifestyle and psychological traits were also less portable than other  
464 quantitative traits ( $p = 1.68 \times 10^{-5}$ ). We note that lifestyle and psychological traits also tended to  
465 have low  $G_{100,UK}$  statistics, a result which can only occur if trait-associated loci have been found  
466 in many parts of the genome. This suggest that the poor PGS performance of these traits is not  
467 simply a byproduct of a lack of GWAS hits. Other comparisons yield only modest differences:  
468 lifestyle and psychological traits were slightly more likely to have SNPs in low recombination  
469 regions of the genome ( $p = 0.012$ ), and no appreciable differences were observed when we  
470 compared  $D$  statistics for different types of quantitative traits. Taken together, Figure 5A reveals  
471 that genetic predictions of lifestyle and psychological traits are severely limited given our present  
472 knowledge of the genetic basis of these traits.

473 A PCA plot generated from six summary statistics of genetic architecture and PGS  
474 performance further demonstrates that lifestyle and psychological traits have different profiles  
475 than other quantitative traits (Figure 5B). Arrows in this plot indicate regions of PCA space that  
476 are associated with higher values of each summary statistic, recapitulating our earlier findings:

477 higher heritability is associated with higher PGS accuracy, and traits that are due to SNPs in high  
478 recombination regions of the genome tend to have more portable predictions. We also note that  
479 the arrows for portability and divergence point in different directions. Lifestyle and psychological  
480 traits form a noticeable cluster in the small region of PCA space pertaining to lower Gini,  
481 heritability, prediction, and portability statistics. By contrast, biological measures and physical  
482 measures occupy larger and more centralized regions of PCA space, which reflects that these  
483 two trait groups are more varied in their genetic architecture and PGS performance. An outlier  
484 among lifestyle and psychological traits is sunscreen use, most likely due to its overlap with  
485 physical measures like skin color and skin tanning.

486

487

## 488 **Discussion**

489 Overall, we found that complex traits have a broad range of genetic architectures, which  
490 contributes to differences in PGS performance. Our results indicate that highly heritable traits are  
491 easier to predict when individuals are ancestry-matched to the original GWAS cohort – a finding  
492 that consistent with expectations from statistical genetics.<sup>53</sup> However, SNP heritability is largely  
493 uninformative when it comes to the portability of genetic predictions. By contrast, we found that  
494 traits with SNPs in high recombination regions of the genome tend to have genetic predictions  
495 that generalize well across populations. This suggests that linkage disequilibrium and the ability  
496 of PGS variants to tag narrow genomic regions may be important for PGS portability.

497         Shifts in PGS distributions are due to allele frequency differences between populations.  
498 Because of this, one might expect to find greater divergence for high Gini traits than for low Gini  
499 traits. The reasoning here is that allele frequency differences at different SNPs can average out  
500 if traits are highly polygenic. However, summary statistics of trait divergence ( $D$ ) were largely  
501 independent of Gini coefficients ( $G_{100,UK}$ ). This suggests that other phenomena like natural

502 selection<sup>54</sup> and ascertainment bias<sup>31</sup> are drivers of ancestry-specific shifts in PGS distributions.  
503 Indeed, hair and skin color, which are among the most divergent traits in our study, have  
504 previously been implicated in scans of selection.<sup>55</sup> We also note that natural selection can erode  
505 the portability of polygenic predictions.<sup>56; 57</sup>

506 Our polygenicity analyses shed light on the omnigenic model. Gini coefficients varied  
507 substantially across traits, and many traits had high Gini-coefficients. Furthermore, this pattern  
508 was not an artifact of focusing on the top 100 genomic bins (see Figure S6). Our results  
509 demonstrated that genetic architectures are often trait-specific, and that core genes can  
510 potentially make outsized contributions to SNP heritability. That said, the omnigenic model  
511 proposes that genetic effects cascade through cellular regulatory networks, as expression of core  
512 genes ends up affecting gene expression at other genes.<sup>16</sup> Because existing GWAS have  
513 generally yielded low-hanging fruit,<sup>6</sup> these indirect effects might be one reason why many PGS  
514 poorly predict complex traits. It also might explain why transcriptional risk scores can potentially  
515 outperform genetic risk scores.<sup>58</sup> When large well-powered GWAS are conducted on diverse  
516 cohorts, rare family-specific or ancestry-specific variants are more likely to be identified. Genetic  
517 associations involving these private alleles are unlikely to yield portable predictions. Indeed, a height  
518 GWAS of 5.4 million individuals found that SNP heritability clusters in genomes, and that out-of-  
519 sample prediction accuracy was lower for individuals who did not have European ancestry.<sup>59</sup>  
520 There is also evidence that pruning sets of trait-associated SNPs can lead to improved PGS  
521 performance among diverse populations.<sup>60</sup>

522 Finally, we mention that PGS are not immune to controversy – especially when it comes  
523 to lifestyle and psychological traits. Some have envisioned a world where PGS for educational  
524 attainment might be used to inform the allocation of resources to those who have the most need.<sup>61</sup>  
525 This has spurred intense debate about both the efficacy of polygenic predictions for behavioral traits  
526 and whether they should be used in a public policy setting.<sup>62; 63</sup> Others have gone a step further



527 and advocated using PGS to screen embryos for cognitive traits,<sup>64</sup> a position that has received  
528 well-warranted criticism.<sup>65; 66</sup> Regardless of the specific trait, there are major challenges to  
529 polygenic screening of embryos.<sup>67-69</sup> Polygenic predictions of complex behavioral traits are  
530 particularly problematic. As seen in Figure 5A, lifestyle and psychological traits are difficult to  
531 predict, which means that any downstream applications of PGS for these traits would be deeply  
532 flawed. This issue is particularly acute when PGS are applied to populations that have ancestries  
533 that differ from the original GWAS population, given their low portability. Ultimately, genetic  
534 predictions of traits like alcohol intake, general happiness, income, or educational attainment in  
535 non-European populations should be treated with extreme skepticism; racist claims about the  
536 supposed intellectual superiority of any particular ancestry are genetically untenable.

537

## 538 **Conclusion**

539 We note that the summary statistics examined here are not exhaustive. Going forward, future  
540 studies will be able to explore additional aspects of genetic architecture and PGS performance.  
541 For example, some traits are highly canalized, while others show evidence of substantial PGS-  
542 by-environment interactions.<sup>70</sup> Epistatic interactions also contribute to the genetic architecture of  
543 complex traits, and this information can be incorporated into predictive models.<sup>71</sup> Finally, we note  
544 that PGS generated from multi-ancestry cohorts are more likely to yield portable predictions.<sup>72</sup>  
545 Nevertheless, we still expect there to be a significant limitations to the genetic prediction of  
546 complex behavioral traits.

547 **Declaration of interests**

548 The authors declare no competing interests.

549

550 **Acknowledgements**

551 We thank study participants from the UK Biobank. In addition, we thank Greg Gibson, Sini Nagpal,  
552 King Jordan, Aaron Pfennig, Mimi Holness, and other members of the Center for Integrative  
553 Genomics at Georgia Institute of Technology for their helpful suggestions and feedback. This  
554 work was funded by an NIGMS MIRA grant (R35GM133727) to J.L. This research has been  
555 conducted using the UK Biobank Resource under application number 17984.

556

557 **Author contributions**

558 N.C.: methodology, formal analysis, data curation, visualization, and writing; A.H.: methodology,  
559 formal analysis, data curation, visualization, and writing; J.L.: conceptualization, funding  
560 acquisition, methodology, supervision, visualization, and writing.

561

562 **Data and code availability**

563 UK Biobank data can be requested via: <https://www.ukbiobank.ac.uk/enable-your-research>.

564 All code used for this paper is available at <https://github.com/LachanceLab/gini/>. Additional details  
565 about how PGS were generated can be found in Privé et al.<sup>28</sup>

566

567 **Supplemental information**

568 Supplemental information, including eight supplemental figures and one supplemental table, can  
569 be found online at [URL](#).

570

571 **Web resources**

572 UK Biobank, <https://www.ukbiobank.ac.uk/>

573 PGS weights and ancestry-specific partial correlations (PGS accuracy statistics) from Privé et  
574 al.,<sup>28</sup> [https://figshare.com/articles/dataset/Effect\\_sizes\\_for\\_215\\_polygenic\\_scores/14074760/2](https://figshare.com/articles/dataset/Effect_sizes_for_215_polygenic_scores/14074760/2)

575 SNP heritabilities from Privé et al.,<sup>28</sup> [https://github.com/privefl/UKBB-PGS/blob/main/phenotype-](https://github.com/privefl/UKBB-PGS/blob/main/phenotype-info.csv)  
576 [info.csv](https://github.com/privefl/UKBB-PGS/blob/main/phenotype-info.csv)

577 Argo Lite, <https://poloclub.github.io/argo-graph-lite/>

578

579 **References**

- 580 1. Visscher, P.M., Wray, N.R., Zhang, Q., Sklar, P., McCarthy, M.I., Brown, M.A., and Yang, J.  
581 (2017). 10 Years of GWAS Discovery: Biology, Function, and Translation. *Am J Hum*  
582 *Genet* 101, 5-22.
- 583 2. Agarwala, V., Flannick, J., Sunyaev, S., Go, T.D.C., and Altshuler, D. (2013). Evaluating  
584 empirical bounds on complex disease genetic architecture. *Nat Genet* 45, 1418-1427.
- 585 3. Watanabe, K., Stringer, S., Frei, O., Umicevic Mirkov, M., de Leeuw, C., Polderman, T.J.C.,  
586 van der Sluis, S., Andreassen, O.A., Neale, B.M., and Posthuma, D. (2019). A global  
587 overview of pleiotropy and genetic architecture in complex traits. *Nat Genet* 51, 1339-  
588 1348.
- 589 4. Sudlow, C., Gallacher, J., Allen, N., Beral, V., Burton, P., Danesh, J., Downey, P., Elliott, P.,  
590 Green, J., Landray, M., et al. (2015). UK biobank: an open access resource for identifying  
591 the causes of a wide range of complex diseases of middle and old age. *PLoS Med* 12,  
592 e1001779.
- 593 5. Buniello, A., MacArthur, J.A.L., Cerezo, M., Harris, L.W., Hayhurst, J., Malangone, C.,  
594 McMahon, A., Morales, J., Mountjoy, E., Sollis, E., et al. (2019). The NHGRI-EBI GWAS  
595 Catalog of published genome-wide association studies, targeted arrays and summary  
596 statistics 2019. *Nucleic Acids Res* 47, D1005-D1012.
- 597 6. Tam, V., Patel, N., Turcotte, M., Bosse, Y., Pare, G., and Meyre, D. (2019). Benefits and  
598 limitations of genome-wide association studies. *Nat Rev Genet* 20, 467-484.

- 599 7. Timpson, N.J., Greenwood, C.M.T., Soranzo, N., Lawson, D.J., and Richards, J.B. (2018).  
600 Genetic architecture: the shape of the genetic contribution to human traits and disease.  
601 Nat Rev Genet 19, 110-124.
- 602 8. Yang, J., Zeng, J., Goddard, M.E., Wray, N.R., and Visscher, P.M. (2017). Concepts, estimation  
603 and interpretation of SNP-based heritability. Nat Genet 49, 1304-1310.
- 604 9. Tang, M., Wang, T., and Zhang, X. (2022). A review of SNP heritability estimation methods.  
605 Brief Bioinform 23.
- 606 10. Scheinfeldt, L.B., Schmidlen, T.J., Gerry, N.P., and Christman, M.F. (2016). Challenges in  
607 Translating GWAS Results to Clinical Care. Int J Mol Sci 17.
- 608 11. Lander, E.S., and Schork, N.J. (1994). Genetic dissection of complex traits. Science 265,  
609 2037-2048.
- 610 12. Glazier, A.M., Nadeau, J.H., and Aitman, T.J. (2002). Finding genes that underlie complex  
611 traits. science 298, 2345-2349.
- 612 13. Hamosh, A., Scott, A.F., Amberger, J.S., Bocchini, C.A., and McKusick, V.A. (2005). Online  
613 Mendelian Inheritance in Man (OMIM), a knowledgebase of human genes and genetic  
614 disorders. Nucleic Acids Res 33, D514-517.
- 615 14. Guo, M.H., Hirschhorn, J.N., and Dauber, A. (2018). Insights and Implications of Genome-  
616 Wide Association Studies of Height. J Clin Endocrinol Metab 103, 3155-3168.
- 617 15. Bulik-Sullivan, B.K., Loh, P.R., Finucane, H.K., Ripke, S., Yang, J., Schizophrenia Working  
618 Group of the Psychiatric Genomics, C., Patterson, N., Daly, M.J., Price, A.L., and Neale,  
619 B.M. (2015). LD Score regression distinguishes confounding from polygenicity in genome-  
620 wide association studies. Nat Genet 47, 291-295.
- 621 16. Boyle, E.A., Li, Y.I., and Pritchard, J.K. (2017). An Expanded View of Complex Traits: From  
622 Polygenic to Omnigenic. Cell 169, 1177-1186.
- 623 17. Johnson, R., Burch, K.S., Hou, K., Paciuc, M., Pasaniuc, B., and Sankararaman, S. (2021).  
624 Estimation of regional polygenicity from GWAS provides insights into the genetic  
625 architecture of complex traits. PLoS Comput Biol 17, e1009483.
- 626 18. Sugrue, L.P., and Desikan, R.S. (2019). What are polygenic scores and why are they  
627 important? Jama 321, 1820-1821.
- 628 19. Torkamani, A., Wineinger, N.E., and Topol, E.J. (2018). The personal and clinical utility of  
629 polygenic risk scores. Nat Rev Genet 19, 581-590.
- 630 20. Lambert, S.A., Abraham, G., and Inouye, M. (2019). Towards clinical utility of polygenic risk  
631 scores. Hum Mol Genet 28, R133-R142.

- 632 21. Choi, S.W., Mak, T.S., and O'Reilly, P.F. (2020). Tutorial: a guide to performing polygenic risk  
633 score analyses. *Nat Protoc* 15, 2759-2772.
- 634 22. Khera, A.V., Chaffin, M., Aragam, K.G., Haas, M.E., Roselli, C., Choi, S.H., Natarajan, P.,  
635 Lander, E.S., Lubitz, S.A., Ellinor, P.T., et al. (2018). Genome-wide polygenic scores for  
636 common diseases identify individuals with risk equivalent to monogenic mutations. *Nat*  
637 *Genet* 50, 1219-1224.
- 638 23. Martin, A.R., Kanai, M., Kamatani, Y., Okada, Y., Neale, B.M., and Daly, M.J. (2019). Clinical  
639 use of current polygenic risk scores may exacerbate health disparities. *Nat Genet* 51, 584-  
640 591.
- 641 24. Lambert, S.A., Gil, L., Jupp, S., Ritchie, S.C., Xu, Y., Buniello, A., McMahon, A., Abraham,  
642 G., Chapman, M., Parkinson, H., et al. (2021). The Polygenic Score Catalog as an open  
643 database for reproducibility and systematic evaluation. *Nat Genet* 53, 420-425.
- 644 25. Mostafavi, H., Harpak, A., Agarwal, I., Conley, D., Pritchard, J.K., and Przeworski, M. (2020).  
645 Variable prediction accuracy of polygenic scores within an ancestry group. *Elife* 9.
- 646 26. Abdellaoui, A., Dolan, C.V., Verweij, K.J.H., and Nivard, M.G. (2022). Gene-environment  
647 correlations across geographic regions affect genome-wide association studies. *Nat*  
648 *Genet* 54, 1345-1354.
- 649 27. Martin, A.R., Gignoux, C.R., Walters, R.K., Wojcik, G.L., Neale, B.M., Gravel, S., Daly, M.J.,  
650 Bustamante, C.D., and Kenny, E.E. (2017). Human Demographic History Impacts Genetic  
651 Risk Prediction across Diverse Populations. *Am J Hum Genet* 100, 635-649.
- 652 28. Ruan, Y., Lin, Y.-F., Feng, Y.-C.A., Chen, C.-Y., Lam, M., Guo, Z., He, L., Sawa, A., Martin,  
653 A.R., and Qin, S. (2022). Improving polygenic prediction in ancestrally diverse populations.  
654 *Nature Genetics* 54, 573-580.
- 655 29. Cavazos, T.B., and Witte, J.S. (2021). Inclusion of variants discovered from diverse  
656 populations improves polygenic risk score transferability. *HGG Adv* 2.
- 657 30. Prive, F., Aschard, H., Carmi, S., Folkersen, L., Hoggart, C., O'Reilly, P.F., and Vilhjalmsón,  
658 B.J. (2022). Portability of 245 polygenic scores when derived from the UK Biobank and  
659 applied to 9 ancestry groups from the same cohort. *Am J Hum Genet* 109, 12-23.
- 660 31. Kim, M.S., Patel, K.P., Teng, A.K., Berens, A.J., and Lachance, J. (2018). Genetic disease  
661 risks can be misestimated across global populations. *Genome Biol* 19, 179.
- 662 32. Novembre, J., and Barton, N.H. (2018). Tread Lightly Interpreting Polygenic Tests of  
663 Selection. *Genetics* 208, 1351-1355.

- 664 33. Berg, J.J., Harpak, A., Sinnott-Armstrong, N., Joergensen, A.M., Mostafavi, H., Field, Y.,  
665 Boyle, E.A., Zhang, X., Racimo, F., Pritchard, J.K., et al. (2019). Reduced signal for  
666 polygenic adaptation of height in UK Biobank. *Elife* 8.
- 667 34. Lachance, J., Berens, A.J., Hansen, M.E.B., Teng, A.K., Tishkoff, S.A., and Rebbeck, T.R.  
668 (2018). Genetic Hitchhiking and Population Bottlenecks Contribute to Prostate Cancer  
669 Disparities in Men of African Descent. *Cancer Res* 78, 2432-2443.
- 670 35. Ju, D., and Mathieson, I. (2021). The evolution of skin pigmentation-associated variation in  
671 West Eurasia. *Proc Natl Acad Sci U S A* 118.
- 672 36. Prive, F., Aschard, H., and Blum, M.G.B. (2019). Efficient Implementation of Penalized  
673 Regression for Genetic Risk Prediction. *Genetics* 212, 65-74.
- 674 37. Park, J.H., Wacholder, S., Gail, M.H., Peters, U., Jacobs, K.B., Chanock, S.J., and Chatterjee,  
675 N. (2010). Estimation of effect size distribution from genome-wide association studies and  
676 implications for future discoveries. *Nat Genet* 42, 570-575.
- 677 38. Shim, H., Chasman, D.I., Smith, J.D., Mora, S., Ridker, P.M., Nickerson, D.A., Krauss, R.M.,  
678 and Stephens, M. (2015). A multivariate genome-wide association analysis of 10 LDL  
679 subfractions, and their response to statin treatment, in 1868 Caucasians. *PLoS One* 10,  
680 e0120758.
- 681 39. Li, S., Zhou, Z., Upadhayay, A., Shaikh, O., Freitas, S., Park, H., Wang, Z.J., Routray, S.,  
682 Hull, M., and Chau, D.H. (2020). Argo lite: Open-source interactive graph exploration and  
683 visualization in browsers. In *Proceedings of the 29th ACM International Conference on*  
684 *Information & Knowledge Management*. pp 3071-3076.
- 685 40. Prive, F., Arbel, J., and Vilhjalmsson, B.J. (2020). LDpred2: better, faster, stronger.  
686 *Bioinformatics*.
- 687 41. Halldorsson, B.V., Palsson, G., Stefansson, O.A., Jonsson, H., Hardarson, M.T., Eggertsson,  
688 H.P., Gunnarsson, B., Oddsson, A., Halldorsson, G.H., and Zink, F. (2019). Characterizing  
689 mutagenic effects of recombination through a sequence-level genetic map. *Science* 363,  
690 eaau1043.
- 691 42. Gini, C. (1912). *Variabilità e mutabilità: contributo allo studio delle distribuzioni e delle relazioni*  
692 *statistiche.*[Fasc. I.].(Tipogr. di P. Cuppini).
- 693 43. Benjamini, Y., and Hochberg, Y. (1995). Controlling the false discovery rate: a practical and  
694 powerful approach to multiple testing. *Journal of the Royal statistical society: series B*  
695 (Methodological) 57, 289-300.

- 696 44. Wilcoxon, F. (1992). Individual comparisons by ranking methods. In *Breakthroughs in*  
697 *statistics*. (Springer), pp 196-202.
- 698 45. Irwin, D.M., and Tan, H. (2014). Evolution of glucose utilization: glucokinase and glucokinase  
699 regulator protein. *Mol Phylogenet Evol* 70, 195-203.
- 700 46. Bulik-Sullivan, B., Finucane, H.K., Anttila, V., Gusev, A., Day, F.R., Loh, P.R., ReproGen, C.,  
701 Psychiatric Genomics, C., Genetic Consortium for Anorexia Nervosa of the Wellcome  
702 Trust Case Control, C., Duncan, L., et al. (2015). An atlas of genetic correlations across  
703 human diseases and traits. *Nat Genet* 47, 1236-1241.
- 704 47. Canela-Xandri, O., Rawlik, K., and Tenesa, A. (2018). An atlas of genetic associations in UK  
705 Biobank. *Nat Genet* 50, 1593-1599.
- 706 48. Yang, J., Wray, N.R., and Visscher, P.M. (2010). Comparing apples and oranges: equating  
707 the power of case-control and quantitative trait association studies. *Genet Epidemiol* 34,  
708 254-257.
- 709 49. Falconer, D.S. (1967). The inheritance of liability to diseases with variable age of onset, with  
710 particular reference to diabetes mellitus. *Ann Hum Genet* 31, 1-20.
- 711 50. Reich, D.E., and Lander, E.S. (2001). On the allelic spectrum of human disease. *Trends Genet*  
712 17, 502-510.
- 713 51. Wright, C.F., FitzPatrick, D.R., and Firth, H.V. (2018). Paediatric genomics: diagnosing rare  
714 disease in children. *Nat Rev Genet* 19, 325.
- 715 52. Hong, E.P., and Park, J.W. (2012). Sample size and statistical power calculation in genetic  
716 association studies. *Genomics Inform* 10, 117-122.
- 717 53. Ma, Y., and Zhou, X. (2021). Genetic prediction of complex traits with polygenic scores: a  
718 statistical review. *Trends Genet* 37, 995-1011.
- 719 54. Racimo, F., Berg, J.J., and Pickrell, J.K. (2018). Detecting Polygenic Adaptation in Admixture  
720 Graphs. *Genetics* 208, 1565-1584.
- 721 55. Quillen, E.E., Norton, H.L., Parra, E.J., Lona-Durazo, F., Ang, K.C., Illiescu, F.M., Pearson,  
722 L.N., Shriver, M.D., Lasisi, T., Gokcumen, O., et al. (2019). Shades of complexity: New  
723 perspectives on the evolution and genetic architecture of human skin. *Am J Phys*  
724 *Anthropol* 168 Suppl 67, 4-26.
- 725 56. Yair, S., and Coop, G. (2022). Population differentiation of polygenic score predictions under  
726 stabilizing selection. *Philos Trans R Soc Lond B Biol Sci* 377, 20200416.
- 727 57. Durvasula, A., and Lohmueller, K.E. (2021). Negative selection on complex traits limits  
728 phenotype prediction accuracy between populations. *Am J Hum Genet* 108, 620-631.



- 729 58. Marigorta, U.M., Denson, L.A., Hyams, J.S., Mondal, K., Prince, J., Walters, T.D., Griffiths, A.,  
730 Noe, J.D., Crandall, W.V., Rosh, J.R., et al. (2017). Transcriptional risk scores link GWAS  
731 to eQTLs and predict complications in Crohn's disease. *Nat Genet* 49, 1517-1521.
- 732 59. Yengo, L., Vedantam, S., Marouli, E., Ferreira, T., Karaderi, T., Malden, D., Fairhurst-Hunter,  
733 Z., Goel, A., Lin, K., and Liu, J. (2022). A saturated map of common genetic variants  
734 associated with human height. *Nature*.
- 735 60. Graham, B.E., Plotkin, B., Muglia, L., Moore, J.H., and Williams, S.M. (2021). Estimating  
736 prevalence of human traits among populations from polygenic risk scores. *Human*  
737 *genomics* 15, 1-16.
- 738 61. Harden, K.P. (2021). *The genetic lottery: why DNA matters for social equality.*(Princeton  
739 University Press).
- 740 62. Harden, K.P., Patterson, N., Reus, V.I., Schlinger Jr., H.D., Felman, M.W., and Riskin, J.  
741 (2022). 'Why Biology is Not Destiny': An Exchange. In *The New York Review of Books*. (
- 742 63. Coop, G., and Przeworski, M. (2022). Lottery, luck, or legacy. A review of "The Genetic Lottery:  
743 Why DNA matters for social equality". *Evolution* 76, 846-853.
- 744 64. Hsu, S.D. (2014). On the genetic architecture of intelligence and other quantitative traits. arXiv  
745 preprint arXiv:14083421.
- 746 65. Kaiser, J. (2019). Screening embryos for complex genetic traits called premature. *Science*  
747 366, 405-406.
- 748 66. Turley, P., Meyer, M.N., Wang, N., Cesarini, D., Hammonds, E., Martin, A.R., Neale, B.M.,  
749 Rehm, H.L., Wilkins-Haug, L., and Benjamin, D.J. (2021). Problems with using polygenic  
750 scores to select embryos. *New England Journal of Medicine* 385, 78-86.
- 751 67. Karavani, E., Zuk, O., Zeevi, D., Barzilai, N., Stefanis, N.C., Hatzimanolis, A., Smyrnis, N.,  
752 Avramopoulos, D., Kruglyak, L., Atzmon, G., et al. (2019). Screening Human Embryos for  
753 Polygenic Traits Has Limited Utility. *Cell* 179, 1424-1435 e1428.
- 754 68. Goldstein, D.B. (2021). *The End of Genetics : designing humanity's dna.*(New Haven: Yale  
755 University Press).
- 756 69. Lencz, T., Backenroth, D., Granot-HersHKovitz, E., Green, A., Gettler, K., Cho, J.H.,  
757 Weissbrod, O., Zuk, O., and Carmi, S. (2021). Utility of polygenic embryo screening for  
758 disease depends on the selection strategy. *Elife* 10.
- 759 70. Nagpal, S., Tandon, R., and Gibson, G. (2022). Canalization of the Polygenic Risk for  
760 Common Diseases and Traits in the UK Biobank Cohort. *Mol Biol Evol* 39.



- 761 71. Moore, J.H., and Williams, S.M. (2009). Epistasis and its implications for personal genetics.  
762 Am J Hum Genet 85, 309-320.
- 763 72. Kullo, I.J., Lewis, C.M., Inouye, M., Martin, A.R., Ripatti, S., and Chatterjee, N. (2022).  
764 Polygenic scores in biomedical research. Nat Rev Genet 23, 524-532.

765
